# Supplementary material
Source: Elsevier journal article supplement (https://rcastoragev2.blob.core.windows.net/2e707bc1c54b0969b782ca951491bc59/mmc1.pdf)
Supplement: mmc1 [file mmc1.pdf]

**Supplemental information**

**Astrocyte calcium dysfunction causes early network  
hyperactivity in Alzheimer's disease**

**Disha Shah, Willy Gsell, Jérôme Wahis, Emma S. Lockett, Tarik Jamouille, Ben Vermaercke, Pranav Preman, Daan Moechars, Véronique Hendrickx, Tom Jaspers, Katleen Craessaerts, Katrien Horré, Leen Wolfs, Mark Fiers, Matthew Holt, Dietmar Rudolf Thal, Zsuzsanna Callaerts-Vegh, Rudi D'Hooge, Rik Vandenberghe, Uwe Himmelreich, Vincent Bonin, and Bart De Strooper**

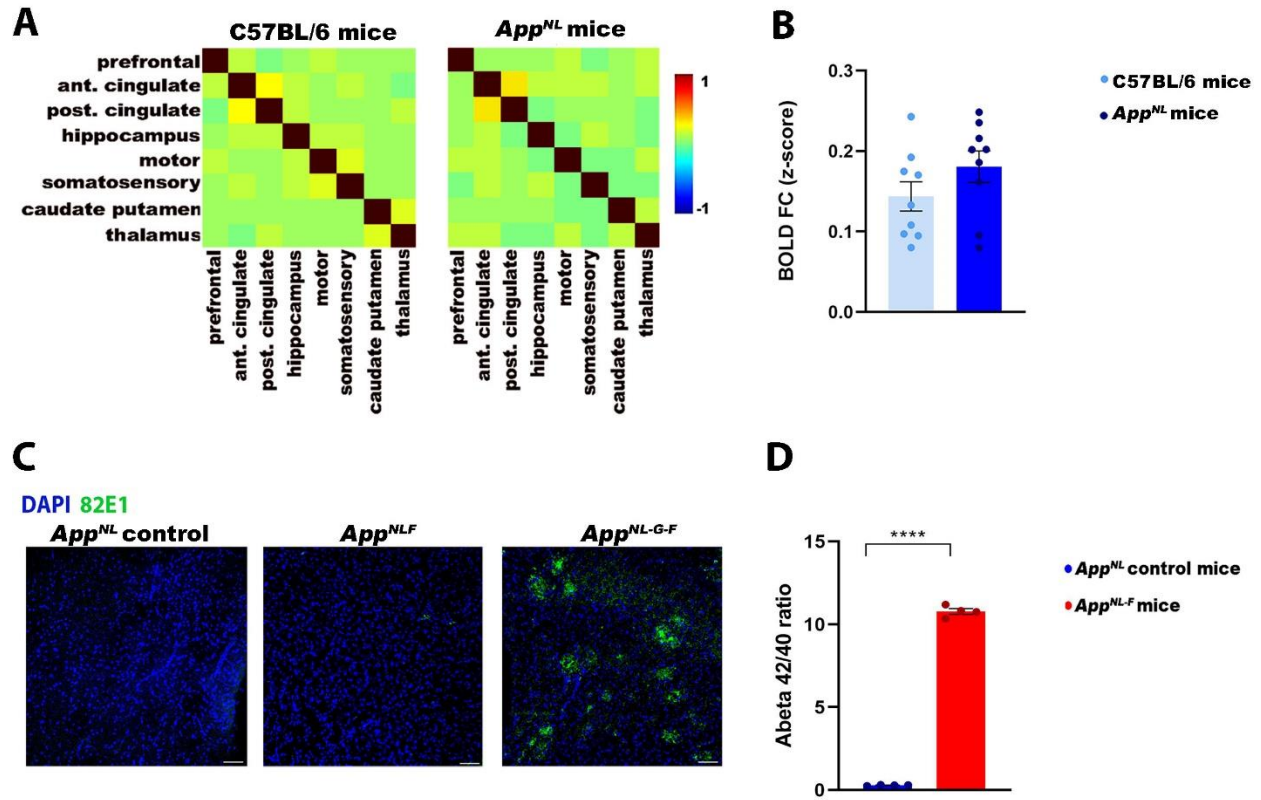

**Figure S1, related to Figure 1: RsfMRI controls and amyloid pathology in *App* mice.** **A)** Mean BOLD FC matrices show correlation between BOLD signals in C57BL/6 mice and *App*<sup>NL</sup> mice (N=9/group). There were no differences between groups (two-sample T-test, FDR correction). Color scale shows z-scores. **B)** Graph shows BOLD FC between anterior-posterior cingulate cortex (z-scores $\pm$ SEM) for each group. **C)** DAPI and 82E1 staining confirm lack of amyloid plaques in the cingulate cortex of 3 months old *App*<sup>NL</sup> and *App*<sup>NL-F</sup> mice. We used 3 months old *App*<sup>NL-G-F</sup> mice as a positive control for the plaque staining. Scale bar=50  $\mu$ m. **D)** Graph shows amyloid-beta 42/40 ratio's $\pm$ SEM in the cingulate cortex of 3 months old *App*<sup>NL</sup> and *App*<sup>NL-F</sup> mice (N=4/group). \*\*\*\*p<0.0001, two-sample T-test.

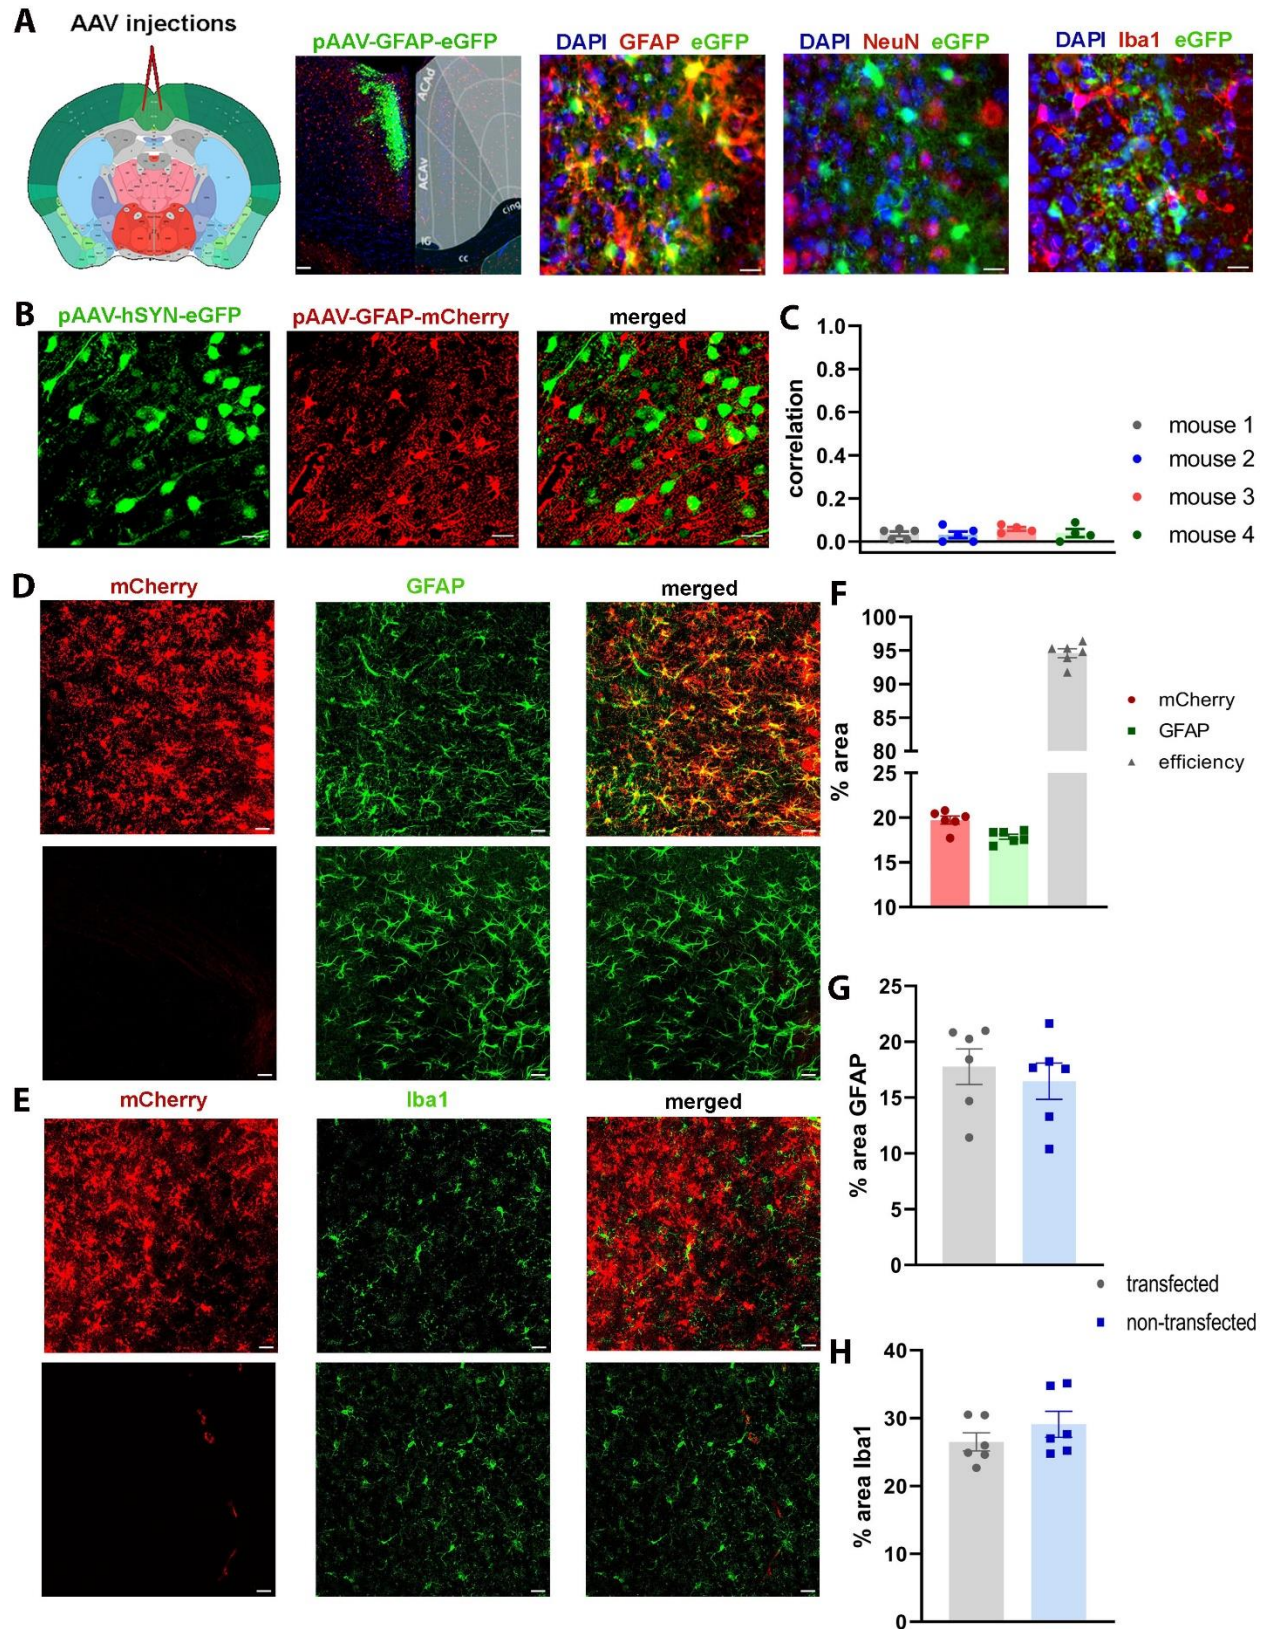

**Figure S2, related to Figure 2: AAV controls. A)** Injection site of local AAV injections in the cingulate cortex shown on the Allen Brain Atlas. pAAV-GFAP-eGFP expression was observed in the target region, i.e. anterior cingulate cortex and there was co-staining with astrocyte marker GFAP, but not with neurons (NeuN) or microglia (Iba1). Scale bar=10 $\mu$ m. **B)** Stereotactical co-injection of pAAV-hSYN-eGFP and pAAV-GFAP-mCherry shows no co-staining, confirming specificity of each AAV. Scale bar=20 $\mu$ m. **C)** Quantification of co-expression (correlation $\pm$ SEM) between pAAV-hSYN-eGFP and pAAV-GFAP-mCherry (N=4 mice, 5 slices per mouse). **D-E)** Co-staining of GFAP (**D**) and Iba1 (**E**) with pAAV-GFAP-mCherry in transfected (upper panel) and non-transfected areas (lower panel). Scale bar=20 $\mu$ m. **F)** Efficiency of AAV-GFAP-mCherry transfection is shown (% area $\pm$ SEM), by quantifying mCherry+GFAP/total GFAP staining (N=6 mice, 5 slices per mouse). **G-H)** Quantification of GFAP and Iba1 staining (% area $\pm$ SEM) in transfected and non-transfected regions (N=6 mice, 5 slices per mouse).



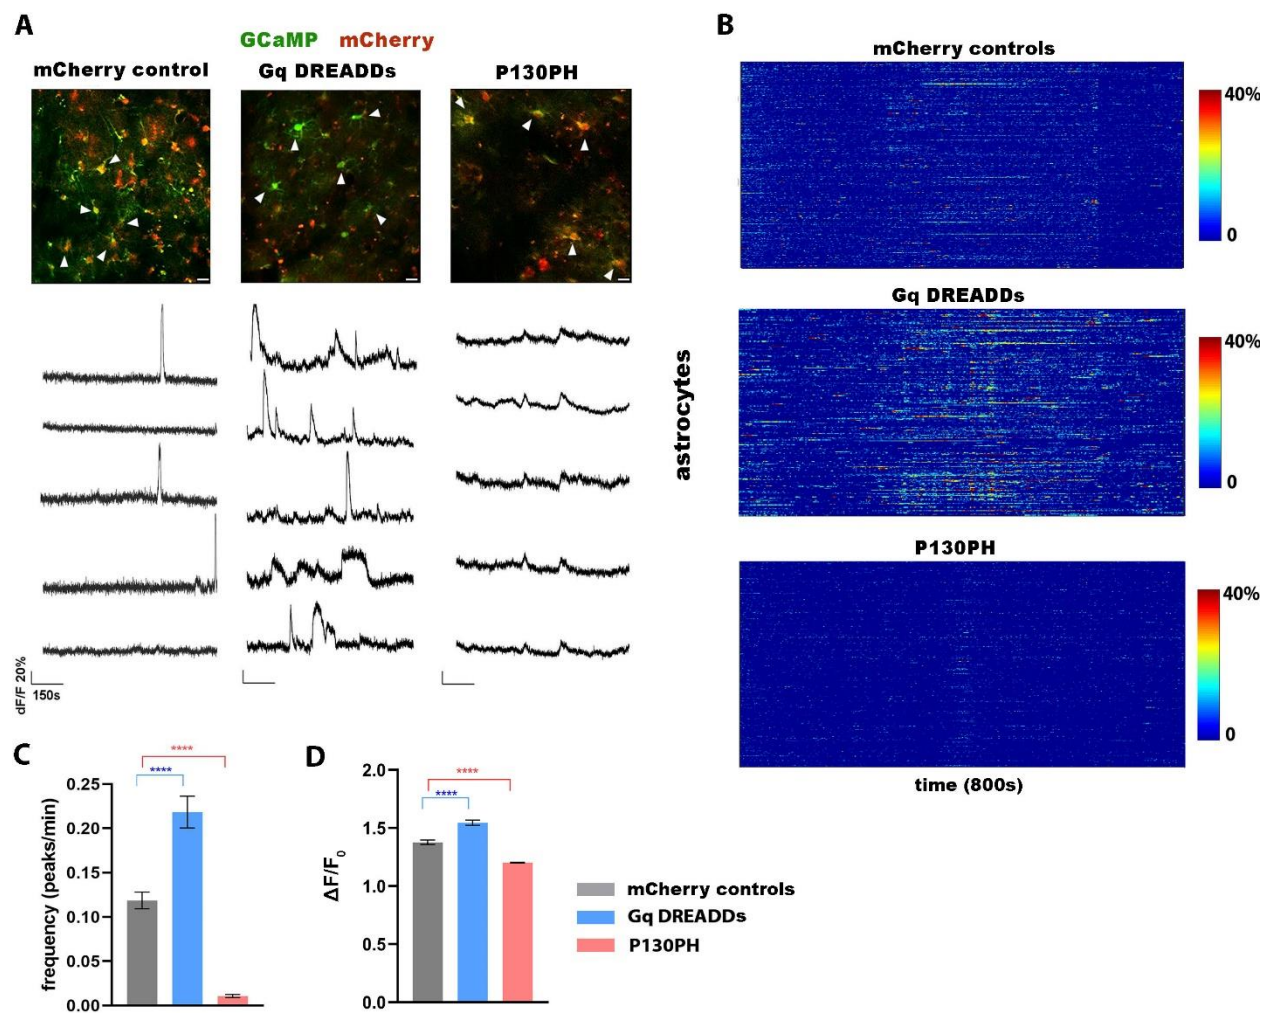

**Figure S3, related to Figure 2: Modulation of astrocyte calcium signaling in-vivo.** **A)** Representative  $\Delta F/F_0$  calcium traces of astrocytes expressing calcium indicator GCaMP6f, in addition to either DREADDs or P130PH (GFAP promotor). DREADDs elicit increased calcium signaling in astrocytes upon CNO injection (3mg/kg) and P130PH expression causes decreased calcium signaling (4 weeks expression) compared to C57BL/6 mice expressing mCherry. Scale bar=20 $\mu$ m. **B)** Heat maps showing astrocyte calcium signals ( $\Delta F/F_0$  exceeding 2\*SD baseline, Y-axis) over time (800s, X-axis) in C57BL/6 mice expressing mCherry (N=5 mice, 329 cells), DREADDs (N=5 mice, 263 cells), and P130PH (N=5 mice, 353 cells). **C-D)** Graphs show quantification of frequency (number of peaks per minute $\pm$ SEM) and signal amplitude ( $\Delta F/F_0 \pm$ SEM), \*\*\*\*p<0.0001, one-way ANOVA with Sidak correction for multiple comparisons.

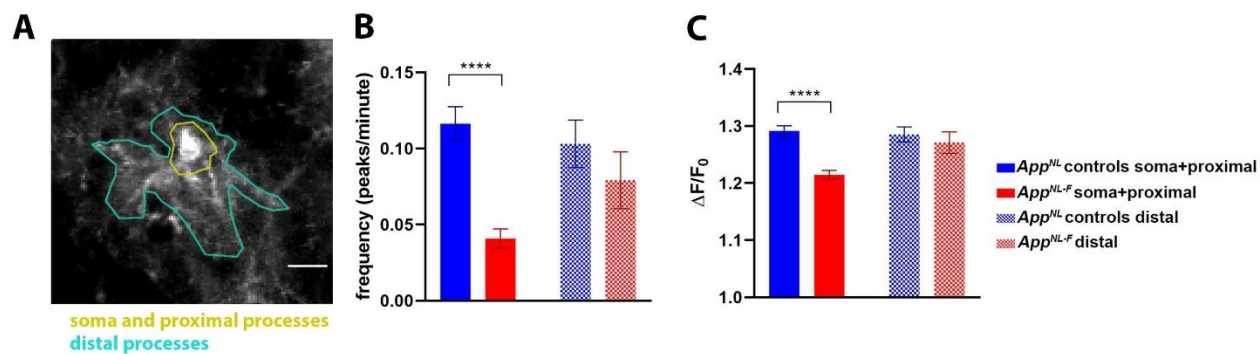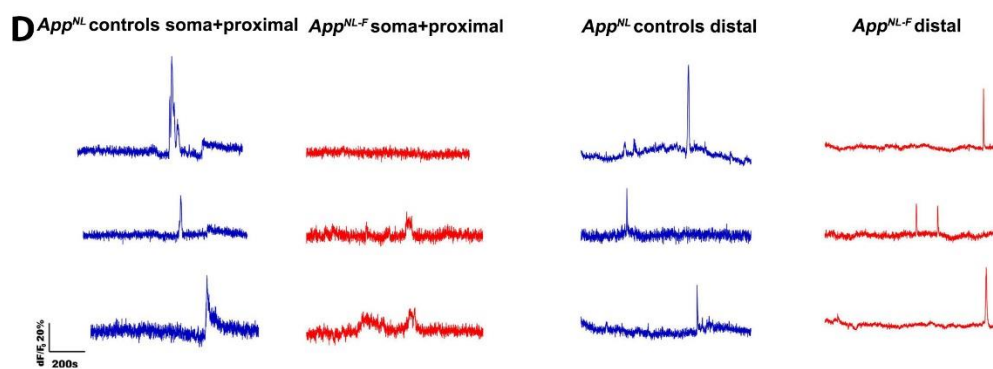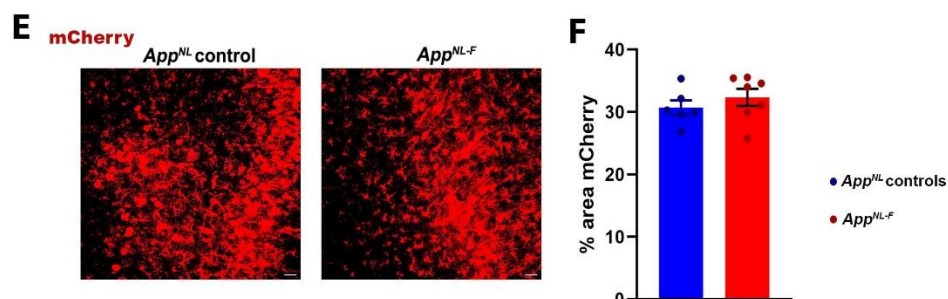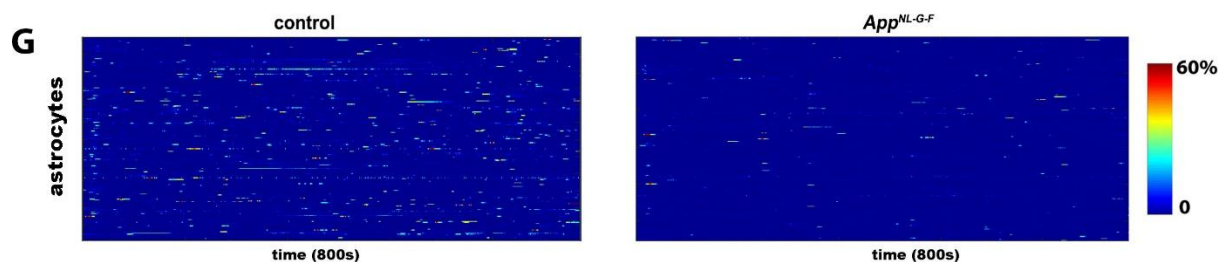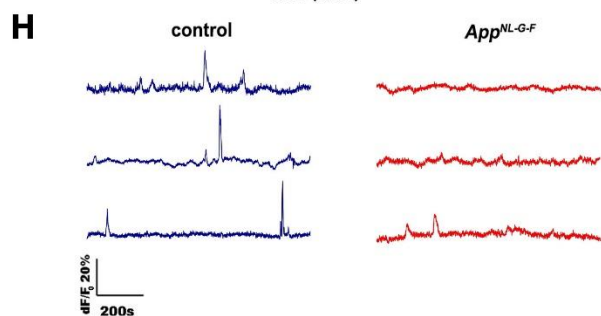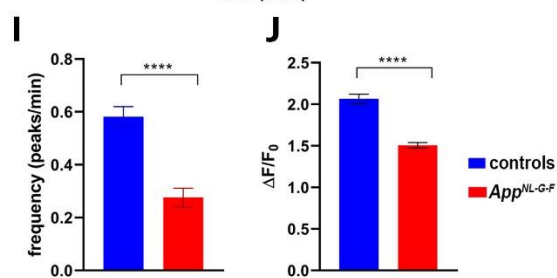

**Figure S4, related to Figure 3: Astrocyte calcium signaling in *App* mice.** **A)** Representative image showing delineation of soma and proximal processes (yellow) and distal processes (blue). Scale bar=10 $\mu$ m. **B-C)** Graphs show frequency (peaks per minute $\pm$ SEM) and amplitude (dF/F<sub>0</sub> $\pm$ SEM) for each analyzed domain of astrocytes in 3 months old control and *APP<sup>NL-F</sup>* mice. \*p<0.05, \*\*\*\*p<0.0001, Kruskal-Wallis test with Dunn's correction. **D)** representative time traces of calcium signals in the different astrocyte domains for controls and *APP<sup>NL-F</sup>* mice. **E)** Representative immunofluorescence images showing expression of pAAV-GFAP-mCherry in 3 months old *App<sup>NL</sup>* control and *App<sup>NL-F</sup>* mice. Scale bar=30 $\mu$ m. **F)** Graph shows pAAV-GFAP-mCherry expression (% area $\pm$ SEM) for *App<sup>NL</sup>* control (N=6, 5 slices per mouse) and *App<sup>NL-F</sup>* mice (N=7, 5 slices per mouse). **G)** Heat maps show astrocyte calcium activity (>2\*SD of baseline, Y-axis) over time (800s, X-axis) for 6 weeks old control mice (N=4 mice, 238 cells) and *App<sup>NL-G-F</sup>* mice (N=4 mice, 277 cells) expressing GCaMP6f in astrocytes (GFAP promoter). **H)** Representative  $\Delta$ F/F<sub>0</sub> calcium traces of astrocytes in the cingulate cortex of control and *App<sup>NL-G-F</sup>* mice. **I-J)** Graphs show frequency (number of peaks per minute $\pm$ SEM) and signal amplitude ( $\Delta$ F/F<sub>0</sub> $\pm$ SEM). \*\*\*\*p<0.0001, Kruskal-Wallis test with Dunn's correction.

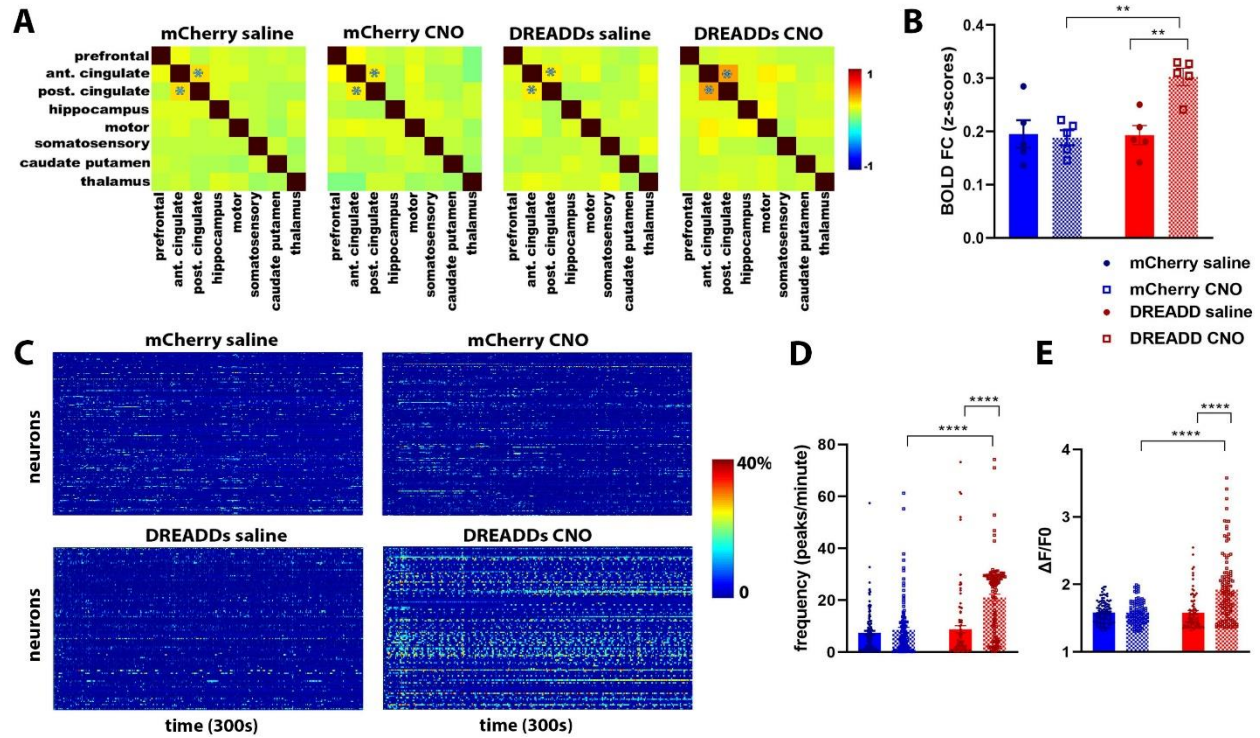

**Figure S5, related to Figure 4: Saline and CNO controls for in-vivo studies. A)** Mean BOLD FC matrices show correlation between BOLD signals in C57BL/6 mice expressing mCherry or DREADDs after injection of saline or CNO (3mg/kg) (N=5/group). Color scale shows z-scores. BOLD FC between the anterior and posterior cingulate cortex is indicated by \*. **B)** Graph shows BOLD FC between anterior-posterior cingulate cortex (z-scores $\pm$ SEM) for each condition. \*\*p<0.01, one-way ANOVA with Sidak correction. **C)** Heat maps show neuronal calcium activity ( $\Delta F/F_0$  exceeding 2\*SD baseline, Y-axis) over time (300s, X-axis) in C57BL/6 mice expressing mCherry injected with saline (N=3 mice, 104 neurons), or CNO (3mg/kg, N=3 mice, 106 neurons), and C57BL/6 mice expressing DREADDs injected with saline (N=3 mice, 86 neurons) or CNO (3mg/kg, N=3 mice, 112 neurons). **D-E)** Graphs show frequency (number of peaks per minute $\pm$ SEM) and signal amplitude ( $\Delta F/F_0$  $\pm$ SEM). \*\*\*\*p<0.0001, Kruskal-Wallis test with Dunn's correction.





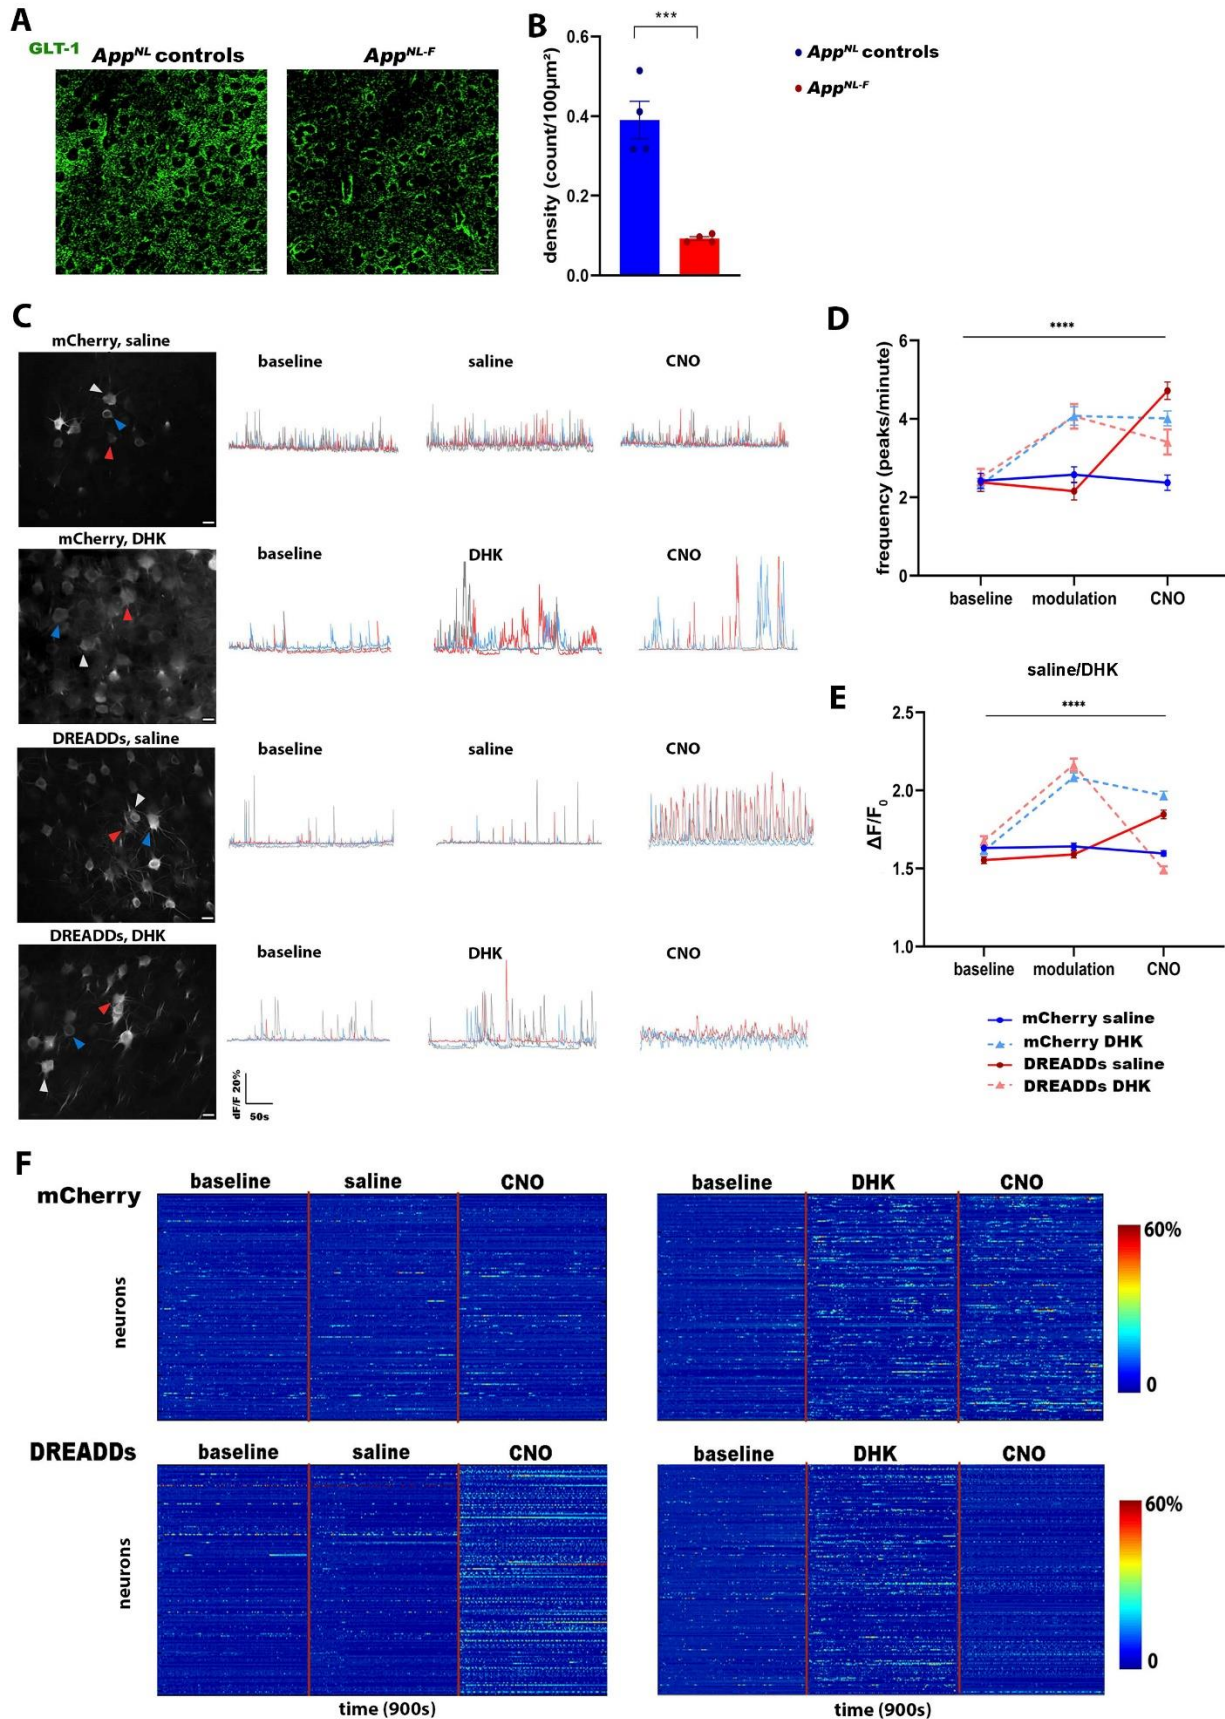

**Figure S7, related to Figure 4: Intact calcium signaling in astrocytes allows regulation of neuronal activity**

**in the healthy brain. A)** Representative immunofluorescence images of GLT-1 expression in 3 months old *App<sup>NL</sup>* control and *App<sup>NL-F</sup>* mice. Scale bar=20 $\mu$ m. **B)** Graph shows GLT-1 expression (density/100 $\mu$ m<sup>2</sup>±SEM) for *App<sup>NL</sup>* control and *App<sup>NL-F</sup>* mice (N=4, 5 slices per mouse). **C)** Representative images and  $\Delta F/F_0$  calcium time traces of neurons from C57BL/6 mice that were injected with dihydrokainic acid (DHK, 10mg/kg) or saline prior to injection of CNO (3mg/kg) to activate DREADDs in astrocytes (N=4/group, mCherry saline N=302 neurons, mCherry DHK N=290 neurons, DREADDs saline N=384 neurons, DREADDs DHK N=200 neurons). Scale bar=20 $\mu$ m. **D-E)** Quantification of frequency (number of peaks/min±SEM) and amplitude ( $\Delta F/F_0$ ±SEM) for each condition. \*\*\*\*p<0.0001 group effect, p<0.0001 time effect, two-way ANOVA with Sidak correction for multiple comparisons. No significant differences were found for  $\Delta F/F_0$  amplitude or frequency in mCherry mice injected with saline. Significant differences were observed in mCherry mice injected with DHK ( $\Delta F/F_0$  and frequency: baseline versus DHK p<0.0001), while subsequent injection of CNO did not cause changes. Significant differences were observed for mice expressing DREADDs injected with CNO ( $\Delta F/F_0$  and frequency, baseline or saline versus CNO, p<0.0001). Finally, significant differences were found for mice expressing DREADDs and injected with DHK ( $\Delta F/F_0$  and frequency for baseline versus DHK p<0.0001; DHK versus CNO  $\Delta F/F_0$  p<0.0001 and frequency p<0.05). **F)** Heatmaps show  $\Delta F/F_0$  calcium time courses for all neurons ( $\Delta F/F_0$  exceeding 2\*SD baseline, Y-axis) over time (900s, X-axis). Red line indicates each 300 seconds scan session, i.e. baseline, after injection of saline or DHK, and after subsequent injection of CNO.

**Table S1, related to STAR methods: Characteristics of F-PACK participants included for analysis.** For each characteristic the mean $\pm$ SEM are shown per group.

|                            | controls               | Amyloid accumulators |
|----------------------------|------------------------|----------------------|
| N                          | 24                     | 10                   |
| baseline CL                | 7.1 $\pm$ 1.1          | 7.7 $\pm$ 2.1        |
| T1 CL                      | 6.1 $\pm$ 1.6          | 42 $\pm$ 5.          |
| Age (years)                | 78 $\pm$ 1.0           | 77 $\pm$ 2.0         |
| gender                     | N=12 female, N=12 male | N=5 female, N=5 male |
| baseline education (years) | 13 $\pm$ 0.56          | 13 $\pm$ 1.04        |
| baseline MMSE              | 29 $\pm$ 0.16          | 29 $\pm$ 0.27        |
| T1 MMSE                    | 29 $\pm$ 0.17          | 29 $\pm$ 0.3         |

**Table S2, related to STAR methods: Seizure scoring**

| score | Behaviour description                                               |
|-------|---------------------------------------------------------------------|
| 1     | Movement arrest                                                     |
| 2     | Neck jerks                                                          |
| 3     | Clonic seizures, sitting position                                   |
| 4     | Myotonic seizures, flat on belly                                    |
| 5     | Clonic or clonic-tonic seizures, sitting position                   |
| 6     | Clonic or clonic-tonic seizures with loss of balance, lying on side |
